# Supplementary material for: Trends in the co-use of alcohol and tobacco among Japanese adolescents: periodical nationwide cross-sectional surveys 1996–2017
Source: HighWire-hosted journal article supplement (doi:10.1136/bmjopen-2020-045063), 2021-08-01
Supplement: bmjopen-2020-045063supp001_data_supplement.pdf [file bmjopen-2020-045063supp001_data_supplement.pdf]

**Supplementary File 1. The list of questions from the survey questionnaire**

※Students were asked to select one option in each question.

**English version****1. Demographic data**

- (1) Are you male or female?
  - 'Male' or 'Female'
- (2) What is your grade in school?
  - 'Grade 1', 'Grade 2', or 'Grade 3'

**2. Use of Alcohol**

- (1) How many days in the past 30 days have you had alcohol?
  - '0 day', '1–2 days', '3–5 days', '6–9 days', '10–19 days', '20–29 days' or 'Every day'
- (2) How much alcohol have you had on a drinking day?
  - 'No glass' 'Less than 1 glass (a little bit)', '1 glass', '2 glasses', '3–5 glasses', 'More than 6 glasses', 'Until get drunk'

**3. Use of cigarettes**

- (1) How many days in the past 30 days have you smoked cigarettes?  
(In the 2017 survey 'cigarettes' was changed to 'combustible cigarette')
  - '0 day', '1–2 days', '3–5 days', '6–9 days', '10–19 days', '20–29 days' or 'Every day'
- (2) How many cigarettes on average per day have you smoked in the past 30 days?  
(In the 2017 survey 'cigarettes' was changed to 'combustible cigarette')
  - (1996 and 2000 survey)
    - 'Have not smoked in the past 30 days', 'Less than 1 cigarette per day', '1–4 cigarettes', '5–9 cigarettes', '10–14 cigarettes', '15–19 cigarettes', 'More than 20 cigarettes'
  - (From the 2004 to 2017 survey)
    - 'Have not smoked in the past 30 days', 'Less than 1 cigarette per day', '1 cigarette', '2–5 cigarettes', '6–10 cigarettes', '11–15 cigarettes', '16–20 cigarettes', 'More than 21 cigarettes'

**4. Intention to pursue future education**

- (1) What is your intention after graduating from school? Choose the option closest to your current feelings.
  - 'senior high school', 'vocational school', '2-year-college', 'college', 'graduate school', 'start working', 'unknown'

**Japanese version****1. あなた自身のことについて質問します。**

(1) あなたは男性ですか、女性ですか？あてはまる数字に○をつけてください。

1. 男性                      2. 女性

(2) あなたの学年は何年生ですか？あてはまる数字に○をつけてください。

1. 1年生                  2. 2年生                  3. 3年生

**2. ここからはお酒についての質問です。**

(1) この30日間に、少しでもお酒を飲んだ日は合計何日になりますか？

1. 0日                  3. 3～5日                  5. 10～19日                  7. 毎日(30日)  
2. 1か2日              4. 6～9日                  6. 20～29日

(2) お酒を飲むときにはどのくらいの量を飲みますか？

1. 飲まない                                              5. コップに3～5杯  
2. コップ1杯未満(ほんの少しの量)              6. コップに6杯以上  
3. コップに1杯                                              7. 酔いつぶれるまで  
4. コップに2杯

**3. ここからはタバコについての質問です。**

(1) この30日間に、何日、タバコを吸いましたか？

(2017年調査のみ「タバコ」を「紙巻きタバコ」に変更)

1. 0日                  3. 3～5日                  5. 10～19日                  7. 毎日(30日)  
2. 1か2日              4. 6～9日                  6. 20～29日

(2) この30日間に、1日平均どのくらいの本数のタバコを吸いましたか？

(2017年調査のみ「タバコ」を「紙巻きタバコ」に変更)

(1996年と2000年の調査)

1. この間、吸っていない              4. 5～9本                  7. 20本以上  
2. 1日1本に満たない                  5. 10～14本  
3. 1～4本                                      6. 15～19本

(2004年から2017年の調査)

1. この間、吸っていない              4. 2～5本                  7. 16～20本  
2. 1日1本に満たない                  5. 6～10本                  8. 21本以上  
3. 1本                                          6. 11～15本

**4. あなたの将来の進学希望についてお聞きします。**

(1) 将来の進路をどのように考えていますか？今の気持ちに近いもの1つに○をつけてください。

1. 高等学校                  3. 短大                      5. 大学院                      7. わからない  
2. 専門学校                  4. 大学                      6. 今の学校卒業後の就職
