# Supplementary material for: Trends in the co-use of alcohol and tobacco among Japanese adolescents: periodical nationwide cross-sectional surveys 1996–2017
Source: HighWire-hosted journal article supplement (doi:10.1136/bmjopen-2020-045063), 2021-08-01
Supplement: bmjopen-2020-045063supp003_data_supplement.pdf [file bmjopen-2020-045063supp003_data_supplement.pdf]

**Supplementary Table 1.** Sampling of the study-participating schools in 1996, 2000, 2004, 2008, 2012, and 2017

|                                       | 1996   |       | 2000   |       | 2004   |       | 2008   |       | 2012   |       | 2017   |       |
|---------------------------------------|--------|-------|--------|-------|--------|-------|--------|-------|--------|-------|--------|-------|
|                                       | n      | (%)   |
| <b><i>Junior high school</i></b>      |        |       |        |       |        |       |        |       |        |       |        |       |
| (A) Number of schools in Japan        | 11,194 |       | 11,153 |       | 11,060 |       | 10,882 |       | 10,018 |       | 10,325 |       |
| (B) Number of schools sampled         | 122    | (1.1) | 132    | (1.2) | 131    | (1.2) | 130    | (1.2) | 140    | (1.4) | 98     | (0.9) |
| (C) Number of schools which took part | 80     |       | 99     |       | 92     |       | 92     |       | 94     |       | 48     |       |
| Response rate                         | 65.6   |       | 75.0   |       | 70.2   |       | 70.8   |       | 67.1   |       | 49.0   |       |
| <b><i>Senior high school</i></b>      |        |       |        |       |        |       |        |       |        |       |        |       |
| (D) Number of schools in Japan        | 5,330  |       | 5,315  |       | 5,193  |       | 5,115  |       | 4,603  |       | 4,907  |       |
| (E) Number of schools sampled         | 109    | (2.0) | 102    | (1.9) | 109    | (2.1) | 110    | (2.2) | 124    | (2.7) | 86     | (1.8) |
| (F) Number of schools which took part | 73     |       | 77     |       | 87     |       | 80     |       | 85     |       | 55     |       |
| Response rate                         | 67.0   |       | 75.5   |       | 79.8   |       | 72.7   |       | 68.5   |       | 64.0   |       |

**Supplementary Table 2.** Prevalence of the amount of alcohol use per day among drinkers on a drinking day

| Year                | 1996       |              | 2000       |              | 2004       |              | 2008       |              | 2012       |              | 2017      |              |
|---------------------|------------|--------------|------------|--------------|------------|--------------|------------|--------------|------------|--------------|-----------|--------------|
| Number of drinkers  | n = 44,545 |              | n = 39,497 |              | n = 30,233 |              | n = 16,110 |              | n = 12,034 |              | n = 3,584 |              |
|                     | %          | 95%CI        | %         | 95%CI        |
| Less than 2 glasses | 42.1       | (41.7, 42.6) | 60.3       | (59.9, 60.8) | 60.9       | (60.4, 61.5) | 61.6       | (60.9, 62.4) | 63.8       | (62.9, 64.6) | 65.2      | (63.6, 66.7) |
| More than 3 glasses | 39.4       | (39.0, 39.9) | 31.3       | (30.9, 31.8) | 32.2       | (31.7, 32.7) | 31.3       | (30.6, 32.0) | 30.2       | (29.3, 31.0) | 27.2      | (25.7, 28.7) |
| Until I got drunk   | 10.6       | (10.3, 10.9) | 6.8        | (6.6, 7.1)   | 5.9        | (5.7, 6.2)   | 5.8        | (5.4, 6.2)   | 4.4        | (4.1, 4.8)   | 5.6       | (4.8, 6.3)   |

CI, confidence interval

**Supplementary Table 3.** Prevalence of the average number of cigarettes smoked among smokers per day

| Year                    | 1996       |              | 2000       |              | 2004      |              | 2008      |              | 2012      |              | 2017    |              |
|-------------------------|------------|--------------|------------|--------------|-----------|--------------|-----------|--------------|-----------|--------------|---------|--------------|
| Number of smokers       | n = 20,070 |              | n = 16,237 |              | n = 9,614 |              | n = 4,966 |              | n = 2,851 |              | n = 769 |              |
|                         | %          | 95%CI        | %          | 95%CI        | %         | 95%CI        | %         | 95%CI        | %         | 95%CI        | %       | 95%CI        |
| Less than 9 cigarettes  | 60.2       | (59.5, 60.9) | 74.0       | (73.2, 74.5) |           |              |           |              |           |              |         |              |
| More than 10 cigarettes | 35.9       | (35.2, 36.5) | 23.0       | (21.9, 23.2) |           |              |           |              |           |              |         |              |
| Less than 10 cigarettes |            |              |            |              | 67.4      | (66.4, 68.3) | 67.3      | (66.0, 68.6) | 73.2      | (71.5, 74.8) | 69.1    | (65.8, 72.3) |
| More than 11 cigarettes |            |              |            |              | 29.3      | (28.4, 30.2) | 28.4      | (27.2, 29.7) | 23.1      | (21.6, 24.7) | 25.0    | (21.9, 28.0) |

CI, confidence interval

**Supplementary Table 4.** Prevalence of the number of days alcohol was used in the past 30 days among drinkers

| Year               | 1996       |              | 2000       |              | 2004       |              | 2008       |              | 2012       |              | 2017      |              |
|--------------------|------------|--------------|------------|--------------|------------|--------------|------------|--------------|------------|--------------|-----------|--------------|
| Number of drinkers | n = 44,545 |              | n = 39,497 |              | n = 30,233 |              | n = 16,110 |              | n = 12,034 |              | n = 3,584 |              |
|                    | %          | 95%CI        | %         | 95%CI        |
| 1-9 days           | 91.5       | (91.3, 91.8) | 91.1       | (90.9, 91.4) | 90.1       | (89.8, 90.5) | 89.6       | (89.2, 90.1) | 90.6       | (90.1, 91.1) | 89.3      | (88.3, 90.3) |
| 10-29 days         | 7.1        | (6.8, 7.3)   | 8.0        | (7.7, 8.3)   | 8.7        | (8.4, 9.0)   | 8.9        | (8.5, 9.4)   | 8.3        | (7.8, 8.8)   | 9.1       | (8.1, 10.0)  |
| Every day          | 1.4        | (1.3, 1.5)   | 0.9        | (0.8, 1.0)   | 1.2        | (1.1, 1.3)   | 1.4        | (1.2, 1.6)   | 1.1        | (1.0, 1.3)   | 1.6       | (1.2, 2.0)   |

CI, confidence interval

**Supplementary Table 5.** Prevalence of the number of days when cigarettes were smoked in the past 30 days among smokers

| Year              | 1996       |              | 2000       |              | 2004      |              | 2008      |              | 2012      |              | 2017    |              |
|-------------------|------------|--------------|------------|--------------|-----------|--------------|-----------|--------------|-----------|--------------|---------|--------------|
| Number of smokers | n = 20,070 |              | n = 16,237 |              | n = 9,614 |              | n = 4,966 |              | n = 2,851 |              | n = 769 |              |
|                   | %          | 95%CI        | %          | 95%CI        | %         | 95%CI        | %         | 95%CI        | %         | 95%CI        | %       | 95%CI        |
| 1-9 days          | 33.0       | (32.4, 33.7) | 32.3       | (31.6, 33.0) | 35.0      | (34.0, 35.9) | 38.4      | (37.1, 39.8) | 38.0      | (36.2, 39.7) | 47.2    | (43.7, 50.7) |
| 10-29 days        | 19.2       | (18.6, 19.7) | 19.0       | (18.4, 19.6) | 21.0      | (20.2, 21.9) | 20.7      | (19.6, 21.8) | 23.7      | (22.2, 25.3) | 21.2    | (18.3, 24.1) |
| Every day         | 47.8       | (47.1, 48.5) | 48.7       | (47.9, 49.5) | 44.0      | (43.0, 45.0) | 40.9      | (39.5, 42.2) | 38.3      | (36.5, 40.1) | 31.6    | (28.3, 34.9) |

CI, confidence interval
